# Supplementary material for: A theoretical study of the NbS2 monolayer as a promising anchoring material for lithium–sulfur batteries
Source: Royal Society of Chemistry journal article supplement (doi:10.1039/d3cp00042g), 2023-01-01
Supplement: d3cp00042g1.pdf [file d3cp00042g1.pdf]

## *Electronic Supplementary Information (ESI) for*

### **Theoretical Study of NbS<sub>2</sub> Monolayer as a Promising Anchoring Material for Lithium-Sulfur Batteries**

Xinxin Zhang,<sup>†</sup> Xiaocheng Zhou,<sup>†,\*</sup> Yu Wang<sup>†</sup> and Yafei Li<sup>†,\*</sup>

<sup>†</sup>Jiangsu Key Laboratory of New Power Batteries, Jiangsu Collaborative Innovation Centre of Biomedical Functional Materials, School of Chemistry and Materials Science, Nanjing Normal University, Nanjing, Jiangsu 210023, China.

To whom correspondence should be addressed. E-mail: [xczhou@njnu.edu.cn](mailto:xczhou@njnu.edu.cn)(XZ) and [liyafei@njnu.edu.cn](mailto:liyafei@njnu.edu.cn)(YL)

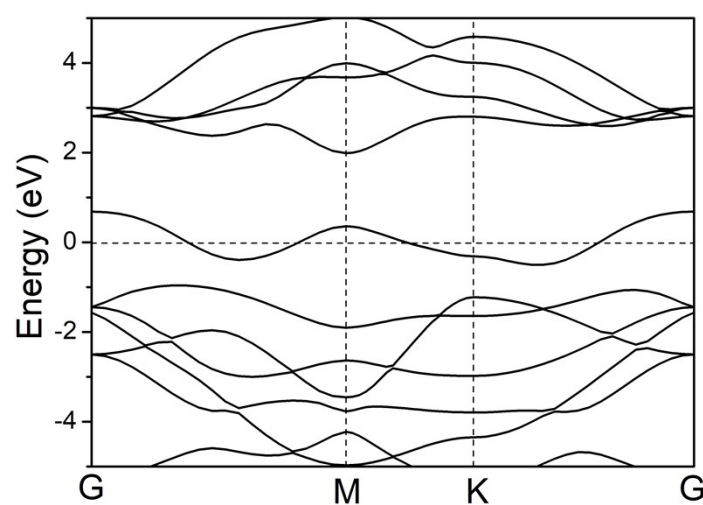

**Figure S1** Electronic band structures of monolayer NbS<sub>2</sub>.

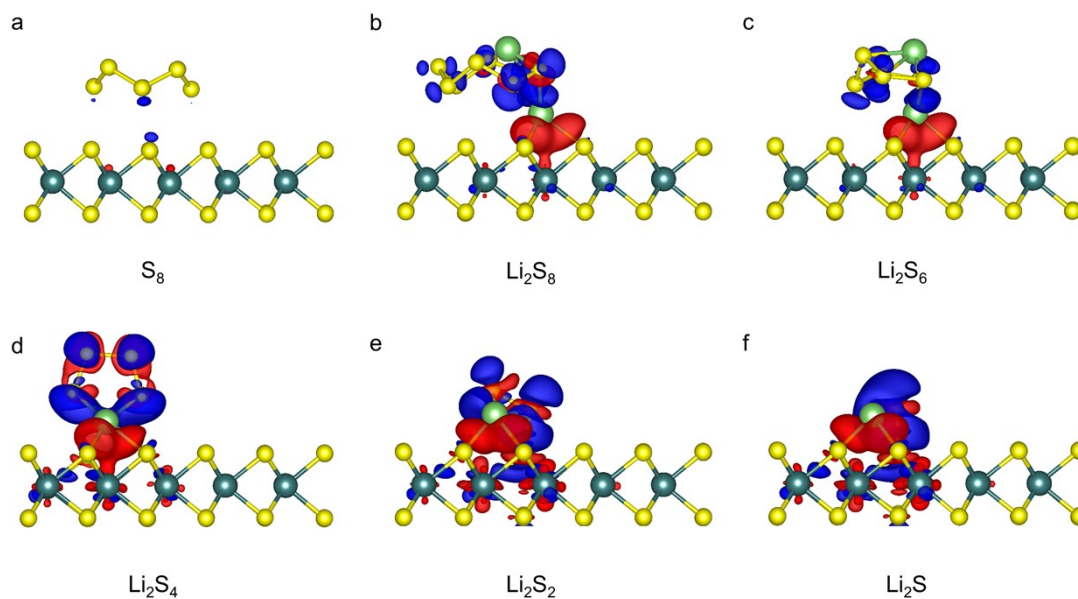

**Figure S2** (a-f) Charge density difference of LiPSs on NbS<sub>2</sub> monolayer. The electron density is drawn with an isosurface of 0.002 eÅ<sup>-3</sup>. The red surface corresponds to charge accumulation, and the blue one corresponds to charge depletion.

**Table S1** The absorption energy of Li<sub>2</sub>S<sub>4</sub> on NbS<sub>2</sub> with or without dipole moment correction.

|                                                      | With  | Without |
|------------------------------------------------------|-------|---------|
| Li <sub>2</sub> S <sub>4</sub> -E <sub>ad</sub> (eV) | -2.43 | -2.47   |

**Table S2** The adsorption energies ( $E_{\text{ads}}$ ), the shortest distance between  $\text{S}_8/\text{Li}_2\text{S}_n$  and  $\text{NbS}_2$  ( $d_{\text{a-s}}$ ), the variances of Li-S bond length in LiPSs ( $\Delta d_{\text{Li-S}}$ ), and charge transfer between adsorbates and  $\text{NbS}_2$  ( $Q_{\text{a-s}}$ ).

|                              | $\text{S}_8$ | $\text{Li}_2\text{S}_8$ | $\text{Li}_2\text{S}_6$ | $\text{Li}_2\text{S}_4$ | $\text{Li}_2\text{S}_2$ | $\text{Li}_2\text{S}$ |
|------------------------------|--------------|-------------------------|-------------------------|-------------------------|-------------------------|-----------------------|
| $E_{\text{ads}}$ (eV)        | -0.85        | -1.74                   | -1.61                   | -2.47                   | -3.39                   | -4.38                 |
| $d_{\text{a-s}}$ (Å)         | 3.00         | 1.62                    | 1.57                    | 1.56                    | 1.66                    | 1.82                  |
| $\Delta d_{\text{Li-S}}$ (Å) | 0.00         | 0.11                    | 0.17                    | 0.30                    | 0.28                    | 0.32                  |
| $Q_{\text{a-s}}$ (e)         | 0.09         | 0.84                    | 0.64                    | 1.00                    | 1.11                    | 1.14                  |

**Table S3** Calculated adsorption energies of  $\text{Li}_2\text{S}_4$  on  $\text{MoS}_2$ ,  $\text{WS}_2$  and  $\text{NbS}_2$ .

|                                              | $\text{MoS}_2$ | $\text{WS}_2$ | $\text{NbS}_2$ |
|----------------------------------------------|----------------|---------------|----------------|
| $\text{Li}_2\text{S}_4 - E_{\text{ad}}$ (eV) | -0.5           | -0.80         | -2.47          |

**Table S4.** Computed zero-point energy (ZPE), entropy corrections (TS), Gibbs free and energy change ( $\Delta G$ ) of critical species on the NbS<sub>2</sub>.

| Reaction Step                   | ZPE (eV) | TS(eV) | Reaction Step                                                                       | $\Delta G$ (eV) |
|---------------------------------|----------|--------|-------------------------------------------------------------------------------------|-----------------|
| *S <sub>8</sub>                 | NA       | NA     | *S <sub>8</sub> +2Li <sup>+</sup> +2e <sup>-</sup> →*Li <sub>2</sub> S <sub>8</sub> | -3.06           |
| *Li <sub>2</sub> S <sub>8</sub> | 0.35     | 0.33   | *Li <sub>2</sub> S <sub>8</sub> →*Li <sub>2</sub> S <sub>6</sub> +1/4S <sub>8</sub> | -0.04           |
| *Li <sub>2</sub> S <sub>6</sub> | 0.31     | 0.39   | *Li <sub>2</sub> S <sub>6</sub> →*Li <sub>2</sub> S <sub>4</sub> +1/4S <sub>8</sub> | -0.60           |
| *Li <sub>2</sub> S <sub>4</sub> | 0.25     | 0.42   | *Li <sub>2</sub> S <sub>4</sub> →*Li <sub>2</sub> S <sub>2</sub> +1/4S <sub>8</sub> | 0.18            |
| *Li <sub>2</sub> S <sub>2</sub> | 0.17     | 0.37   | *Li <sub>2</sub> S <sub>2</sub> →*Li <sub>2</sub> S+1/8S <sub>8</sub>               | 0.09            |
| *Li <sub>2</sub> S              | 0.14     | 0.19   |                                                                                     |                 |

### Coordinates for Structures

S<sub>8</sub>

```

16.6709995270      0.0000000000      0.0000000000
-8.3354997635     14.4375090968      0.0000000000
0.0000000000      0.0000000000     20.0000000000

```

Nb S

25 58

Direct

```

0.135060007      0.067659001      0.224602008
0.332756000      0.069397003      0.224030995
0.536438970      0.068951006      0.223782015
0.731850964      0.067965002      0.224222994
0.935043993      0.069815001      0.224917984
0.131852004      0.266150005      0.223480010
0.333163004      0.264559013      0.222896004

```

|             |              |             |
|-------------|--------------|-------------|
| 0.533629012 | 0.267520026  | 0.223063993 |
| 0.731559027 | 0.264218003  | 0.222501993 |
| 0.934118000 | 0.266694995  | 0.223161983 |
| 0.133817008 | 0.469015016  | 0.221931982 |
| 0.332907004 | 0.469132991  | 0.221469998 |
| 0.536957047 | 0.468282033  | 0.222811985 |
| 0.731204965 | 0.468314004  | 0.222617006 |
| 0.936736002 | 0.468950017  | 0.221064997 |
| 0.133471990 | 0.665460010  | 0.222572994 |
| 0.332126005 | 0.666323023  | 0.222677016 |
| 0.533816980 | 0.667630985  | 0.223257017 |
| 0.731852024 | 0.663882015  | 0.223977995 |
| 0.933872962 | 0.667845004  | 0.223098993 |
| 0.131862014 | 0.867052993  | 0.224273992 |
| 0.332919018 | 0.865460994  | 0.223831987 |
| 0.534228081 | 0.867326066  | 0.223993015 |
| 0.730565002 | 0.865925033  | 0.224861002 |
| 0.935397050 | 0.866069033  | 0.225044990 |
| 0.999612969 | 0.000168000  | 0.146982002 |
| 0.000008000 | 0.000475000  | 0.302811003 |
| 0.199994993 | 0.000055000  | 0.145477998 |
| 0.200326034 | -0.000000991 | 0.303264999 |
| 0.399993003 | 0.000762000  | 0.146797001 |
| 0.400195994 | 0.000741000  | 0.301142979 |
| 0.599654994 | 0.999873006  | 0.144926000 |
| 0.599473018 | 0.999931003  | 0.303092980 |
| 0.800429008 | 0.000322000  | 0.147107005 |
| 0.800051980 | 0.000610000  | 0.302361012 |
| 0.999815004 | 0.199857000  | 0.144173992 |
| 0.000485006 | 0.201967005  | 0.303831005 |

|             |             |             |
|-------------|-------------|-------------|
| 0.199706016 | 0.200252010 | 0.145129991 |
| 0.200605014 | 0.201787004 | 0.302335000 |
| 0.400961030 | 0.200443009 | 0.143671012 |
| 0.401569970 | 0.201873008 | 0.302631998 |
| 0.599179961 | 0.200312005 | 0.143691003 |
| 0.600448027 | 0.201765008 | 0.302195024 |
| 0.800623059 | 0.200098002 | 0.144578993 |
| 0.801164997 | 0.201718009 | 0.302105999 |
| 0.000013012 | 0.399022037 | 0.143231010 |
| 0.000391010 | 0.400775013 | 0.300747991 |
| 0.199155996 | 0.399170991 | 0.144010007 |
| 0.200133989 | 0.401021003 | 0.300496006 |
| 0.400503014 | 0.400333004 | 0.144947004 |
| 0.399775010 | 0.401219995 | 0.298435974 |
| 0.599621999 | 0.399455029 | 0.142820001 |
| 0.599946011 | 0.399686025 | 0.301941991 |
| 0.799811015 | 0.400361011 | 0.144832003 |
| 0.801530033 | 0.401327995 | 0.297903013 |
| 0.000395995 | 0.601956009 | 0.143248010 |
| 0.000065006 | 0.600315987 | 0.301131010 |
| 0.200664012 | 0.601049003 | 0.142928004 |
| 0.200174011 | 0.600293991 | 0.301799011 |
| 0.401210967 | 0.601972985 | 0.143551004 |
| 0.399975965 | 0.600581992 | 0.301377010 |
| 0.600104981 | 0.601183029 | 0.144199002 |
| 0.599021962 | 0.600144970 | 0.302202988 |
| 0.800862037 | 0.601258993 | 0.144124007 |
| 0.801239036 | 0.600108045 | 0.302044010 |
| 0.000184037 | 0.800674066 | 0.144438994 |
| 0.000017004 | 0.798792018 | 0.304053998 |

|             |             |             |
|-------------|-------------|-------------|
| 0.199705025 | 0.801170009 | 0.145463002 |
| 0.199196009 | 0.799435991 | 0.301690006 |
| 0.400935032 | 0.801180050 | 0.144951999 |
| 0.399994006 | 0.799555023 | 0.302065992 |
| 0.600086000 | 0.800652070 | 0.144569993 |
| 0.598487019 | 0.799246016 | 0.303555989 |
| 0.800405027 | 0.800777046 | 0.147439003 |
| 0.799713004 | 0.799712036 | 0.302041006 |
| 0.447041988 | 0.377902003 | 0.455493975 |
| 0.673035998 | 0.542663001 | 0.452055025 |
| 0.503880032 | 0.210649003 | 0.458541012 |
| 0.729123978 | 0.374030006 | 0.455210018 |
| 0.749800967 | 0.494278039 | 0.500296021 |
| 0.428821003 | 0.261828997 | 0.505550957 |
| 0.548686021 | 0.496457039 | 0.500989962 |
| 0.629613008 | 0.260035017 | 0.506037998 |

Li<sub>2</sub>S<sub>8</sub>

|               |               |               |
|---------------|---------------|---------------|
| 16.6709995270 | 0.0000000000  | 0.0000000000  |
| -8.3354997635 | 14.4375090968 | 0.0000000000  |
| 0.0000000000  | 0.0000000000  | 20.0000000000 |

Li S Nb

2 58 25

Direct

|             |             |             |
|-------------|-------------|-------------|
| 0.666830017 | 0.343690003 | 0.544899988 |
| 0.723650007 | 0.454800010 | 0.387269998 |
| 0.997120022 | 0.000610000 | 0.149460006 |
| 0.997329995 | 0.001340000 | 0.307800007 |
| 0.196840002 | 0.001050000 | 0.151600003 |
| 0.198459996 | 0.002660000 | 0.305579996 |

|             |             |             |
|-------------|-------------|-------------|
| 0.396679998 | 0.000660000 | 0.149629998 |
| 0.398440011 | 0.002800000 | 0.306410027 |
| 0.597069981 | 0.000740000 | 0.149150002 |
| 0.597290011 | 0.001960000 | 0.305760002 |
| 0.797709986 | 0.001230000 | 0.151040006 |
| 0.797249941 | 0.001850000 | 0.305000019 |
| 0.997479980 | 0.201980001 | 0.148650002 |
| 0.996929982 | 0.202710012 | 0.307029986 |
| 0.197450013 | 0.201820015 | 0.148490000 |
| 0.199280000 | 0.203030017 | 0.307009983 |
| 0.395859971 | 0.201470005 | 0.146950006 |
| 0.398420015 | 0.203650012 | 0.305539989 |
| 0.597000053 | 0.201050008 | 0.145980000 |
| 0.598120022 | 0.203400009 | 0.304569983 |
| 0.798740057 | 0.201660013 | 0.147019994 |
| 0.797779956 | 0.202840008 | 0.305449986 |
| 0.997739943 | 0.401760030 | 0.148379993 |
| 0.996339977 | 0.401259991 | 0.306279993 |
| 0.197649998 | 0.402270010 | 0.151360011 |
| 0.197720009 | 0.402180010 | 0.304899979 |
| 0.396790000 | 0.401580029 | 0.147870004 |
| 0.398209986 | 0.401129994 | 0.306069994 |
| 0.595740032 | 0.401269998 | 0.147459996 |
| 0.596779995 | 0.400610007 | 0.302150011 |
| 0.798669973 | 0.401389988 | 0.148110008 |
| 0.796259979 | 0.400750011 | 0.302549982 |
| 0.998249967 | 0.603390004 | 0.148939991 |
| 0.996330009 | 0.600630014 | 0.308209991 |
| 0.198519996 | 0.603380029 | 0.150290000 |
| 0.198110001 | 0.602270036 | 0.307460022 |



|             |             |             |
|-------------|-------------|-------------|
| 0.397430029 | 0.603000013 | 0.149909997 |
| 0.397580006 | 0.602129999 | 0.307130003 |
| 0.598049995 | 0.603000013 | 0.148020005 |
| 0.597030007 | 0.600440039 | 0.307539988 |
| 0.799080024 | 0.604750017 | 0.149540007 |
| 0.795960035 | 0.599609988 | 0.306250000 |
| 0.997050036 | 0.801830034 | 0.150150001 |
| 0.996439996 | 0.801070002 | 0.308279991 |
| 0.197950018 | 0.801970005 | 0.151180005 |
| 0.198459996 | 0.802129991 | 0.307389998 |
| 0.397089985 | 0.801610004 | 0.149220002 |
| 0.397989998 | 0.802179995 | 0.308310008 |
| 0.597080013 | 0.801689997 | 0.150189996 |
| 0.596849982 | 0.801660008 | 0.306519985 |
| 0.798389960 | 0.801639993 | 0.149649990 |
| 0.797420021 | 0.800719975 | 0.307669997 |
| 0.590829999 | 0.407790022 | 0.480299997 |
| 0.500790038 | 0.281210024 | 0.517129993 |
| 0.476369991 | 0.169440010 | 0.455150032 |
| 0.546220026 | 0.111210006 | 0.501580000 |
| 0.668129983 | 0.142340005 | 0.454670000 |
| 0.781359936 | 0.238300008 | 0.512030029 |
| 0.806800026 | 0.449270023 | 0.492350006 |
| 0.848420034 | 0.360510000 | 0.459619999 |
| 0.129290004 | 0.070380006 | 0.228439999 |
| 0.333559997 | 0.070990010 | 0.227600002 |
| 0.531899994 | 0.070430001 | 0.226959991 |
| 0.730429975 | 0.070600003 | 0.227200007 |
| 0.934329981 | 0.070210004 | 0.228209996 |
| 0.129260003 | 0.265260026 | 0.228080010 |

|             |             |             |
|-------------|-------------|-------------|
| 0.330650018 | 0.268570008 | 0.226620007 |
| 0.529330019 | 0.265370024 | 0.224930000 |
| 0.728829969 | 0.265120005 | 0.225070000 |
| 0.930920006 | 0.268450002 | 0.226940012 |
| 0.129250022 | 0.470140037 | 0.228139997 |
| 0.334100030 | 0.469930014 | 0.228020000 |
| 0.530010012 | 0.470700021 | 0.226129985 |
| 0.730669962 | 0.469090022 | 0.223320007 |
| 0.933830000 | 0.470950007 | 0.226810002 |
| 0.128550003 | 0.666920031 | 0.229360008 |
| 0.331630026 | 0.669790069 | 0.229020000 |
| 0.531440036 | 0.666640023 | 0.228480005 |
| 0.728550007 | 0.668280044 | 0.228279996 |
| 0.932619995 | 0.668529998 | 0.228909993 |
| 0.128680004 | 0.866090039 | 0.229360008 |
| 0.332040005 | 0.868260022 | 0.228929996 |
| 0.529420055 | 0.867860057 | 0.228149986 |
| 0.730380037 | 0.865730037 | 0.228410006 |
| 0.930859977 | 0.868480053 | 0.229010010 |

Li<sub>2</sub>S<sub>6</sub>

|               |               |               |
|---------------|---------------|---------------|
| 16.6709995270 | 0.0000000000  | 0.0000000000  |
| -8.3354997635 | 14.4375090968 | 0.0000000000  |
| 0.0000000000  | 0.0000000000  | 20.0000000000 |

Li S Nb

2 56 25

Direct

|             |             |             |
|-------------|-------------|-------------|
| 0.735552014 | 0.467891018 | 0.385333014 |
| 0.735118982 | 0.462455029 | 0.535067034 |
| 0.998064967 | 0.996291024 | 0.148385000 |

|             |             |             |
|-------------|-------------|-------------|
| 0.997290993 | 0.995544071 | 0.306901002 |
| 0.197733982 | 0.996400015 | 0.150769997 |
| 0.198849047 | 0.996758035 | 0.304414988 |
| 0.397236040 | 0.995400070 | 0.148187995 |
| 0.398981027 | 0.996548045 | 0.305187988 |
| 0.597211015 | 0.995073030 | 0.147616994 |
| 0.597438000 | 0.996552009 | 0.305042005 |
| 0.798475982 | 0.996688017 | 0.150135994 |
| 0.797370970 | 0.996802028 | 0.303681993 |
| 0.998452045 | 0.197329013 | 0.148611999 |
| 0.996982968 | 0.197054008 | 0.306892014 |
| 0.198837001 | 0.197206018 | 0.149114990 |
| 0.199476994 | 0.197089001 | 0.307116985 |
| 0.397264999 | 0.196861011 | 0.147872996 |
| 0.399275027 | 0.197343017 | 0.305907011 |
| 0.597285000 | 0.195641002 | 0.145114005 |
| 0.598188971 | 0.196261014 | 0.304286981 |
| 0.799681059 | 0.197020006 | 0.147073007 |
| 0.797503001 | 0.197491014 | 0.304865003 |
| 0.998396982 | 0.396291012 | 0.147836995 |
| 0.996416963 | 0.396131026 | 0.306709003 |
| 0.198253998 | 0.396759014 | 0.151335001 |
| 0.198256999 | 0.396948990 | 0.305263996 |
| 0.397570990 | 0.396079008 | 0.148310006 |
| 0.399181990 | 0.396216997 | 0.306973982 |
| 0.596279007 | 0.395825025 | 0.147131991 |
| 0.597548007 | 0.395535009 | 0.303086019 |
| 0.799277049 | 0.396240018 | 0.147083998 |
| 0.797106999 | 0.395243012 | 0.302487993 |
| 0.998679051 | 0.596741998 | 0.147327006 |

|             |             |             |
|-------------|-------------|-------------|
| 0.996943955 | 0.595529024 | 0.306357002 |
| 0.198839006 | 0.596872986 | 0.150004005 |
| 0.198497007 | 0.597113031 | 0.306182003 |
| 0.397613005 | 0.596617021 | 0.150025988 |
| 0.398370005 | 0.597149031 | 0.306223011 |
| 0.597419988 | 0.596365020 | 0.147276998 |
| 0.597928037 | 0.595351005 | 0.306525993 |
| 0.798855040 | 0.598294034 | 0.148965001 |
| 0.797668984 | 0.596000065 | 0.303643990 |
| 0.997797021 | 0.797034022 | 0.148056996 |
| 0.997120091 | 0.796073049 | 0.306431007 |
| 0.198779020 | 0.796681022 | 0.149168992 |
| 0.199134031 | 0.796974043 | 0.306010985 |
| 0.397872043 | 0.796133027 | 0.147889996 |
| 0.398699001 | 0.797378038 | 0.307233000 |
| 0.596976987 | 0.796140029 | 0.148588002 |
| 0.597483988 | 0.796975034 | 0.305912995 |
| 0.798972034 | 0.797137068 | 0.147884989 |
| 0.798075966 | 0.796365079 | 0.305827999 |
| 0.864118992 | 0.494244021 | 0.467016983 |
| 0.627141019 | 0.481589010 | 0.467618990 |
| 0.533145028 | 0.346475986 | 0.484346962 |
| 0.584303000 | 0.264101002 | 0.455824995 |
| 0.697242007 | 0.291477003 | 0.525619984 |
| 0.820855053 | 0.357241022 | 0.475767994 |
| 0.129637996 | 0.064809003 | 0.227961016 |
| 0.334540017 | 0.065015005 | 0.227023005 |
| 0.532592024 | 0.064669998 | 0.225685000 |
| 0.729785006 | 0.064905006 | 0.226223016 |
| 0.934824038 | 0.065041996 | 0.227538013 |

|             |             |             |
|-------------|-------------|-------------|
| 0.129797993 | 0.260091015 | 0.228394008 |
| 0.332073004 | 0.263682013 | 0.227792001 |
| 0.531511029 | 0.260852022 | 0.225504994 |
| 0.728563023 | 0.260199015 | 0.224239016 |
| 0.931590036 | 0.263798007 | 0.227143002 |
| 0.128829007 | 0.463396020 | 0.228189993 |
| 0.334196030 | 0.463470035 | 0.228323007 |
| 0.530895996 | 0.464372020 | 0.226602006 |
| 0.730681052 | 0.462045023 | 0.223310995 |
| 0.933528011 | 0.464554994 | 0.226223016 |
| 0.129089994 | 0.662585019 | 0.227814007 |
| 0.332492014 | 0.665280010 | 0.228216004 |
| 0.533375970 | 0.663033006 | 0.227778006 |
| 0.728706004 | 0.664121994 | 0.226425004 |
| 0.934611013 | 0.664246970 | 0.226698995 |
| 0.129281001 | 0.860098029 | 0.227586007 |
| 0.332296043 | 0.862495044 | 0.227339005 |
| 0.530209049 | 0.862680065 | 0.227098012 |
| 0.729803040 | 0.860213031 | 0.226877999 |
| 0.931443998 | 0.863372985 | 0.227228999 |

Li<sub>2</sub>S<sub>4</sub>

|               |               |               |
|---------------|---------------|---------------|
| 16.6709995270 | 0.0000000000  | 0.0000000000  |
| -8.3354997635 | 14.4375090968 | 0.0000000000  |
| 0.0000000000  | 0.0000000000  | 20.0000000000 |

Li S Nb

2 54 25

Direct

|             |             |             |
|-------------|-------------|-------------|
| 0.524063036 | 0.262685007 | 0.382474995 |
| 0.338467988 | 0.265769989 | 0.381672001 |

|             |             |             |
|-------------|-------------|-------------|
| 0.000060000 | 0.001099000 | 0.147361994 |
| 0.001595000 | 0.001468000 | 0.305884004 |
| 0.198161047 | 0.999768044 | 0.145587993 |
| 0.201579005 | 0.001507000 | 0.304517007 |
| 0.401714018 | 0.999852000 | 0.145429993 |
| 0.400210991 | 0.001663000 | 0.304224992 |
| 0.600465973 | 0.000695000 | 0.147132993 |
| 0.598860001 | 0.001079000 | 0.305760002 |
| 0.800539974 | 0.000866000 | 0.147979999 |
| 0.800446994 | 0.001010000 | 0.306251001 |
| 0.000000001 | 0.200143003 | 0.148861003 |
| 0.000928007 | 0.200969999 | 0.305011988 |
| 0.197431002 | 0.199247012 | 0.146741009 |
| 0.201295009 | 0.200880015 | 0.304612994 |
| 0.400164001 | 0.200251003 | 0.145835996 |
| 0.399844993 | 0.199764010 | 0.298032999 |
| 0.601271981 | 0.199194002 | 0.146183991 |
| 0.598711010 | 0.200230014 | 0.305002975 |
| 0.800047985 | 0.200448013 | 0.149703991 |
| 0.799641059 | 0.201081005 | 0.304176998 |
| 0.000404012 | 0.401547034 | 0.148960996 |
| 0.000588010 | 0.401937025 | 0.305117989 |
| 0.199330016 | 0.400551019 | 0.146797001 |
| 0.200399997 | 0.400837006 | 0.306102014 |
| 0.401453000 | 0.403130017 | 0.146348000 |
| 0.399763012 | 0.399774011 | 0.302754021 |
| 0.601584006 | 0.402754988 | 0.146026993 |
| 0.599493058 | 0.399420020 | 0.303442001 |
| 0.801166030 | 0.400905010 | 0.147459996 |
| 0.800440054 | 0.400850019 | 0.305765986 |

|             |             |             |
|-------------|-------------|-------------|
| 0.000588012 | 0.600547049 | 0.147341990 |
| 0.000966010 | 0.600840995 | 0.306295991 |
| 0.199267012 | 0.600362028 | 0.147696006 |
| 0.199548023 | 0.600768995 | 0.305658007 |
| 0.400659038 | 0.600995036 | 0.147627997 |
| 0.400234997 | 0.599947993 | 0.304729009 |
| 0.600536035 | 0.601263022 | 0.146264005 |
| 0.599051040 | 0.598962051 | 0.305851007 |
| 0.800670070 | 0.601418054 | 0.148353994 |
| 0.800105988 | 0.600248016 | 0.304718995 |
| 0.999530961 | 0.800184068 | 0.149325001 |
| 0.000641988 | 0.800498029 | 0.303885984 |
| 0.199369024 | 0.799156049 | 0.147203994 |
| 0.199950006 | 0.800003010 | 0.305094004 |
| 0.400318025 | 0.800149058 | 0.149527001 |
| 0.399616994 | 0.800368032 | 0.303182983 |
| 0.599975027 | 0.799834041 | 0.148154998 |
| 0.599008978 | 0.799037017 | 0.305279994 |
| 0.799935993 | 0.800376024 | 0.149253988 |
| 0.799783989 | 0.799650010 | 0.304661012 |
| 0.492117024 | 0.381536004 | 0.447699022 |
| 0.369845993 | 0.153499011 | 0.455824995 |
| 0.391976005 | 0.199682003 | 0.547412968 |
| 0.470932034 | 0.346847018 | 0.541858006 |
| 0.133435996 | 0.066134997 | 0.225853992 |
| 0.331064998 | 0.062265002 | 0.222593999 |
| 0.532899073 | 0.066552001 | 0.225482988 |
| 0.731805968 | 0.064531001 | 0.227002001 |
| 0.932951964 | 0.065945002 | 0.227055001 |
| 0.135207003 | 0.269755999 | 0.226391006 |

|             |             |             |
|-------------|-------------|-------------|
| 0.331824017 | 0.268593029 | 0.221502018 |
| 0.537063002 | 0.268828995 | 0.221701002 |
| 0.732541986 | 0.269165018 | 0.226364994 |
| 0.934922995 | 0.268379009 | 0.227025008 |
| 0.135443024 | 0.467394018 | 0.226966000 |
| 0.331218015 | 0.466892031 | 0.225659990 |
| 0.534828027 | 0.468690024 | 0.224765015 |
| 0.734011966 | 0.466401009 | 0.225979996 |
| 0.932799005 | 0.468395021 | 0.227032995 |
| 0.133096985 | 0.667125992 | 0.226620007 |
| 0.331497036 | 0.664224049 | 0.226447010 |
| 0.534002013 | 0.665911961 | 0.226283002 |
| 0.730847995 | 0.665181984 | 0.226640987 |
| 0.933783023 | 0.665089044 | 0.226745987 |
| 0.136732007 | 0.869295043 | 0.226015997 |
| 0.332071003 | 0.869268027 | 0.225843000 |
| 0.536296993 | 0.869213993 | 0.226606989 |
| 0.733029049 | 0.868703055 | 0.227120996 |
| 0.934301963 | 0.869683052 | 0.226849008 |

Li<sub>2</sub>S<sub>2</sub>

|               |               |               |
|---------------|---------------|---------------|
| 16.6709995270 | 0.0000000000  | 0.0000000000  |
| -8.3354997635 | 14.4375090968 | 0.0000000000  |
| 0.0000000000  | 0.0000000000  | 20.0000000000 |

Li S Nb

2 52 25

Direct

|             |             |             |
|-------------|-------------|-------------|
| 0.426695008 | 0.305510027 | 0.396427989 |
| 0.681463003 | 0.304062028 | 0.395694995 |
| 0.000890000 | 0.000913000 | 0.148378003 |



|             |             |             |
|-------------|-------------|-------------|
| 0.000336000 | 0.000009000 | 0.305258012 |
| 0.200061001 | 0.000564000 | 0.149326992 |
| 0.200359993 | 0.000081000 | 0.304486990 |
| 0.399363055 | 0.999125062 | 0.146780992 |
| 0.399576029 | 0.998923064 | 0.306497002 |
| 0.600393003 | 0.000520000 | 0.148912001 |
| 0.600045020 | 0.000366000 | 0.304129982 |
| 0.800059036 | 0.000913000 | 0.148176003 |
| 0.798897989 | 0.000135000 | 0.305084991 |
| 0.000656001 | 0.201187007 | 0.149189997 |
| 0.000282003 | 0.201317004 | 0.305218005 |
| 0.200437993 | 0.200449004 | 0.147216010 |
| 0.201734006 | 0.200829004 | 0.306739998 |
| 0.398553985 | 0.199500994 | 0.147753000 |
| 0.398617998 | 0.198897018 | 0.305531001 |
| 0.600561016 | 0.199552997 | 0.147503996 |
| 0.599915981 | 0.198643002 | 0.305206013 |
| 0.799983966 | 0.200772014 | 0.146887004 |
| 0.798905024 | 0.200956012 | 0.306531000 |
| 0.000511011 | 0.400510032 | 0.150205994 |
| 0.000137009 | 0.400543027 | 0.304888988 |
| 0.200188008 | 0.400489026 | 0.150312006 |
| 0.200328997 | 0.400290992 | 0.305011988 |
| 0.397803025 | 0.399681005 | 0.147593999 |
| 0.401129983 | 0.400451012 | 0.306502008 |
| 0.600445999 | 0.400661001 | 0.153303003 |
| 0.601507990 | 0.403019011 | 0.296373987 |
| 0.802022010 | 0.399741016 | 0.147443998 |
| 0.799566017 | 0.400437008 | 0.306407976 |
| 0.001757005 | 0.600359980 | 0.147262001 |

|             |             |             |
|-------------|-------------|-------------|
| 0.001524997 | 0.601490055 | 0.306537008 |
| 0.200772012 | 0.600990016 | 0.148020995 |
| 0.201093016 | 0.601795032 | 0.306643009 |
| 0.398811980 | 0.600453977 | 0.147477996 |
| 0.400209002 | 0.601466010 | 0.306745005 |
| 0.601281005 | 0.603115016 | 0.145706999 |
| 0.601490972 | 0.602129008 | 0.304818010 |
| 0.801923978 | 0.603122017 | 0.145560992 |
| 0.800961948 | 0.602256032 | 0.304778004 |
| 0.000748024 | 0.800934060 | 0.149285007 |
| 0.000256996 | 0.800357991 | 0.303472018 |
| 0.200769038 | 0.799230031 | 0.147838998 |
| 0.201033002 | 0.799601988 | 0.305675006 |
| 0.398829005 | 0.799174016 | 0.147835994 |
| 0.399213997 | 0.799823009 | 0.305799007 |
| 0.600186999 | 0.800866023 | 0.149215996 |
| 0.600243992 | 0.800470021 | 0.303437996 |
| 0.800295003 | 0.800567981 | 0.146106005 |
| 0.799189016 | 0.798813023 | 0.305467987 |
| 0.609417014 | 0.421838007 | 0.404215002 |
| 0.550665951 | 0.297422015 | 0.451449013 |
| 0.134057004 | 0.069175000 | 0.227051997 |
| 0.335938973 | 0.066248002 | 0.226693010 |
| 0.530249011 | 0.066187004 | 0.226310992 |
| 0.735077026 | 0.069459004 | 0.226557994 |
| 0.933133991 | 0.066573002 | 0.227017999 |
| 0.134440005 | 0.265298998 | 0.227307010 |
| 0.332971020 | 0.267056004 | 0.225784993 |
| 0.529851984 | 0.259929014 | 0.225832009 |
| 0.733849017 | 0.267077009 | 0.225537992 |

|             |             |             |
|-------------|-------------|-------------|
| 0.930705002 | 0.265442999 | 0.227121997 |
| 0.135141996 | 0.470143010 | 0.227719998 |
| 0.336507011 | 0.469807019 | 0.227653003 |
| 0.530166973 | 0.472952012 | 0.224283004 |
| 0.743052001 | 0.473003007 | 0.224235010 |
| 0.933531021 | 0.469854018 | 0.227460003 |
| 0.132790987 | 0.665952981 | 0.227007008 |
| 0.333519035 | 0.666073070 | 0.227186990 |
| 0.530726060 | 0.663781016 | 0.226181006 |
| 0.733777016 | 0.667367028 | 0.224943995 |
| 0.933265972 | 0.663750036 | 0.226047993 |
| 0.135765006 | 0.866023059 | 0.226631999 |
| 0.334376025 | 0.868418027 | 0.226657009 |
| 0.530550038 | 0.866211052 | 0.226510000 |
| 0.735921069 | 0.867135034 | 0.226177001 |
| 0.931095050 | 0.867016993 | 0.226301003 |

Li<sub>2</sub>S

|               |               |               |
|---------------|---------------|---------------|
| 16.6709995270 | 0.0000000000  | 0.0000000000  |
| -8.3354997635 | 14.4375090968 | 0.0000000000  |
| 0.0000000000  | 0.0000000000  | 20.0000000000 |

Li S Nb

2 51 25

Direct

|             |             |             |
|-------------|-------------|-------------|
| 0.432537981 | 0.314678010 | 0.389039993 |
| 0.683449949 | 0.314334027 | 0.388673019 |
| 0.000228026 | 0.999727024 | 0.149057007 |
| 0.000358043 | 0.999720022 | 0.305777025 |
| 0.199130024 | 0.999388028 | 0.149313998 |
| 0.200630058 | 0.999609049 | 0.304612994 |

|             |             |             |
|-------------|-------------|-------------|
| 0.398957054 | 0.998074055 | 0.146316004 |
| 0.399350004 | 0.998454996 | 0.306200004 |
| 0.600258022 | 0.999460028 | 0.148844004 |
| 0.599398033 | 0.999847046 | 0.304224014 |
| 0.799664954 | 0.999812037 | 0.148707008 |
| 0.798618045 | 0.999787002 | 0.305464005 |
| 0.000274001 | 0.200159005 | 0.149313998 |
| 0.000036003 | 0.200922010 | 0.305353999 |
| 0.200042993 | 0.199760014 | 0.147479999 |
| 0.201590007 | 0.200373007 | 0.306912994 |
| 0.396780009 | 0.198111009 | 0.146952009 |
| 0.399930009 | 0.198525011 | 0.305023003 |
| 0.600944965 | 0.197971005 | 0.146597993 |
| 0.598874970 | 0.198407003 | 0.304800010 |
| 0.799832017 | 0.199906013 | 0.146867013 |
| 0.798650003 | 0.200609006 | 0.306422997 |
| 0.000425004 | 0.399620003 | 0.149734998 |
| 0.000006005 | 0.399998995 | 0.304579997 |
| 0.199660000 | 0.399657027 | 0.150142002 |
| 0.199745016 | 0.399940041 | 0.304944015 |
| 0.397588021 | 0.399260034 | 0.148092997 |
| 0.399462015 | 0.400362035 | 0.306501007 |
| 0.600174017 | 0.400879017 | 0.154363012 |
| 0.600212006 | 0.399777016 | 0.297400999 |
| 0.801875983 | 0.399281007 | 0.147367001 |
| 0.801179023 | 0.400473008 | 0.305685997 |
| 0.001519015 | 0.600498961 | 0.146994996 |
| 0.001321006 | 0.600525977 | 0.306604004 |
| 0.200648008 | 0.600578029 | 0.147760999 |
| 0.200493003 | 0.600905003 | 0.306643987 |

|             |             |             |
|-------------|-------------|-------------|
| 0.399069019 | 0.600303040 | 0.147566009 |
| 0.399377023 | 0.600810015 | 0.307114983 |
| 0.601035040 | 0.602298043 | 0.146859002 |
| 0.600499981 | 0.600630014 | 0.306180000 |
| 0.801380996 | 0.602456972 | 0.146482003 |
| 0.800297988 | 0.600285007 | 0.305693007 |
| 0.000092983 | 0.800149983 | 0.149979997 |
| 0.000120002 | 0.799277062 | 0.304215002 |
| 0.200222026 | 0.798638043 | 0.147880006 |
| 0.200905986 | 0.798672986 | 0.305676007 |
| 0.398647003 | 0.798466035 | 0.147927999 |
| 0.398701029 | 0.799100034 | 0.305864000 |
| 0.599942053 | 0.799788000 | 0.149897993 |
| 0.599708014 | 0.799860000 | 0.304110003 |
| 0.799796006 | 0.799317026 | 0.147394001 |
| 0.798825989 | 0.798111054 | 0.306405020 |
| 0.598517006 | 0.395470011 | 0.399445009 |
| 0.133901005 | 0.068447004 | 0.227318001 |
| 0.335350027 | 0.065026003 | 0.226146007 |
| 0.529767997 | 0.065009997 | 0.225913000 |
| 0.734544009 | 0.068705999 | 0.226706004 |
| 0.932826017 | 0.065882001 | 0.227470994 |
| 0.134235009 | 0.264864007 | 0.227450991 |
| 0.332645002 | 0.266326026 | 0.226020002 |
| 0.529174964 | 0.258212005 | 0.223225999 |
| 0.733606019 | 0.266366997 | 0.225379014 |
| 0.930523971 | 0.264941011 | 0.227003002 |
| 0.134951009 | 0.469803023 | 0.227379990 |
| 0.335820991 | 0.469787004 | 0.227455997 |
| 0.529619967 | 0.472197000 | 0.225378013 |

|             |             |             |
|-------------|-------------|-------------|
| 0.742645049 | 0.472090023 | 0.224698019 |
| 0.934219013 | 0.469819999 | 0.226710010 |
| 0.132591993 | 0.665216993 | 0.226876998 |
| 0.332973027 | 0.665382065 | 0.227243996 |
| 0.530132996 | 0.662835038 | 0.227068996 |
| 0.733071006 | 0.665992020 | 0.226559997 |
| 0.932901987 | 0.662783977 | 0.226639009 |
| 0.135451014 | 0.865252061 | 0.227010989 |
| 0.334064035 | 0.867682038 | 0.226531005 |
| 0.530162981 | 0.865509016 | 0.226775002 |
| 0.735447020 | 0.866297056 | 0.227020001 |
| 0.930795033 | 0.866159992 | 0.227347994 |
